# Supplementary material for: Key drivers involved in the telemonitoring of covid-19 for self-health management: an exploratory factor analysis
Source: Springer Nature journal article supplement (doi:10.1186/s12913-022-07828-3), 2022-04-19
Supplement: MOESM1 [file 20324320]

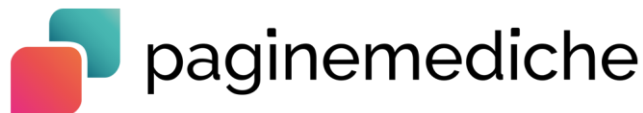

Salerno (Italy)  
28<sup>th</sup> February 2022

To whom it may concerns:

With reference to the study conducted by Lo Presti L., Testa M., Maggioni G. and Marino V., entitled “Key Drivers Involved in the Telemonitoring of Covid-19 for Self-Health Management: an Exploratory Factor Analysis”, we confirm that the survey included had been performed in accordance with the anonymity and total respect for privacy has been granted pursuant to Regulation (EU) no. 2016/679 - European Union regulation on the processing of personal data and privacy.

Customers have been informed that the data collected would have been processed in compliance with the security measures required by law and the information provided would have been used exclusively for research purposes and disseminated externally only in aggregate form.

Since the survey was conducted on clients of a payment health service platform and no clinical trials were conducted, the Board of PagineMediche.it believes that the approval procedure of the Ethics committee is not needed, and it is not applicable for this research. Those who agreed to participate with informed consent were surveyed. Participant’s privacy and confidentiality were protected.

Sincerely,

Institutional Review Board  
Graziella Bilotta (Chief Executive Officer)  
Alessandro Sbenaglia (Chief Technology Officer)  
Emanuele Urbani (Chief Medical Officer)

*Graziella Bilotta*  
\_\_\_\_\_  
Graziella Bilotta

**Pagine Mediche Srl società unipersonale**

Società soggetta all'attività di direzione e coordinamento di Healthware Group Srl

| Capitale Sociale € 10.068,34 | P.IVA IT 05418080650

| Sede Legale: Via San Leonardo 26, 84131 Salerno, Italia

| Sede Operativa: Palazzo Innovazione – Piazza Abate Conforti, 84121 Salerno, Italia
